# Supplementary material
Source: publisher site journal article supplement (http://kjim.org/upload/media/kjim-2020-142-suppl9.pdf)
Supplement: Supplementary file 1 [file kjim-2020-142-suppl9.pdf]

**Supplementary Table 9. Association of comorbid atrial fibrillation with patient and hospital characteristics in critical illness**

| Variable                       | Unadjusted model 1 |          |
|--------------------------------|--------------------|----------|
|                                | OR (95% CI)        | p value  |
| Year, per unit increase        | 1.08 (1.08–1.09)   | < 0.0001 |
| Age, yr                        |                    |          |
| Per unit increase              | 1.05 (1.05–1.05)   | < 0.0001 |
| 45–64 vs. 18–44                | 3.22(3.08–3.37)    | < 0.0001 |
| 65–74 vs. 18–44                | 6.11(5.81–6.41)    | < 0.0001 |
| ≥ 75 vs. 18–44                 | 9.63(9.15–10.14)   | < 0.0001 |
| Race                           |                    |          |
| Black vs. white                | 0.60 (0.59–0.62)   | < 0.0001 |
| Hispanic vs. white             | 0.67 (0.65–0.69)   | < 0.0001 |
| Others vs. white               | 0.81 (0.78–0.84)   | < 0.0001 |
| Missing vs. white              | 0.82 (0.77–0.87)   | < 0.0001 |
| Insurance                      |                    |          |
| Medicaid vs. Medicare          | 0.95 (0.92–0.98)   | 0.0016   |
| Private vs. Medicare           | 1.03 (1.01–1.05)   | 0.0100   |
| Self-pay vs. Medicare          | 0.95 (0.90–1.00)   | 0.0579   |
| Others vs. Medicare            | 0.92 (0.88–0.97)   | 0.0011   |
| Female sex                     | 0.80 (0.79–0.82)   | < 0.0001 |
| Income quartile                |                    |          |
| Q2 vs. Q1                      | 1.02 (1.00–1.04)   | 0.1097   |
| Q3 vs. Q1                      | 1.07 (1.04–1.09)   | < 0.0001 |
| Q4 vs. Q1                      | 1.13 (1.10–1.16)   | < 0.0001 |
| Hospital bed size              |                    |          |
| Medium vs. small               | 1.03 (0.98–1.08)   | 0.1982   |
| Large vs. small                | 1.10 (1.06–1.15)   | < 0.0001 |
| Hospital type                  |                    |          |
| Urban nonteaching vs. rural    | 1.04 (0.98–1.10)   | 0.2425   |
| Urban teaching vs. rural       | 1.10 (1.04–1.17)   | 0.0013   |
| Hospital region                |                    |          |
| Midwest vs. northeast          | 1.18 (1.12–1.24)   | < 0.0001 |
| South vs. northeast            | 1.05 (1.00–1.10)   | 0.0314   |
| West vs. northeast             | 1.13 (1.07–1.18)   | < 0.0001 |
| Elective                       | 1.16 (1.12–1.20)   | < 0.0001 |
| Major operating room procedure | 1.06 (1.04–1.09)   | < 0.0001 |
| Long-term anticoagulants       | 4.57 (4.38–4.77)   | < 0.0001 |
| Prior stroke                   | 1.11 (1.08–1.15)   | < 0.0001 |
| Coronary artery disease        | 1.38 (1.36–1.41)   | < 0.0001 |
| AIDS                           | 0.68 (0.56–0.82)   | 0.0001   |
| Alcohol abuse                  | 0.96 (0.94–0.99)   | 0.0192   |
| Deficiency anemias             | 1.08 (1.06–1.11)   | < 0.0001 |
| Rheumatoid arthritis           | 1.07 (1.02–1.12)   | 0.0036   |

**Supplementary Table 9. Continued**

| Variable                            | Unadjusted model 1 |          |
|-------------------------------------|--------------------|----------|
|                                     | OR (95% CI)        | p value  |
| Chronic blood loss anemia           | 1.09 (1.03–1.15)   | 0.0047   |
| Congestive heart failure            | 1.55 (1.52–1.57)   | < 0.0001 |
| Chronic pulmonary disease           | 1.17 (1.15–1.19)   | < 0.0001 |
| Coagulopathy                        | 1.24 (1.21–1.27)   | < 0.0001 |
| Depression                          | 0.93 (0.90–0.95)   | < 0.0001 |
| Diabetes, uncomplicated             | 1.08 (1.05–1.10)   | < 0.0001 |
| Diabetes with chronic complications | 0.94 (0.91–0.97)   | 0.0003   |
| Drug abuse                          | 0.83 (0.78–0.87)   | < 0.0001 |
| Hypertension                        | 1.19 (1.17–1.21)   | < 0.0001 |
| Hypothyroidism                      | 1.14 (1.11–1.17)   | < 0.0001 |
| Liver disease                       | 0.91 (0.88–0.95)   | < 0.0001 |
| Lymphoma                            | 0.99 (0.93–1.05)   | 0.7154   |
| Fluid and electrolyte disorders     | 1.04 (1.02–1.06)   | 0.0002   |
| Metastatic cancer                   | 0.96 (0.92–1.00)   | 0.0512   |
| Other neurological disorders        | 0.88 (0.86–0.90)   | < 0.0001 |
| Obesity                             | 1.25 (1.22–1.27)   | < 0.0001 |
| Paralysis                           | 0.94 (0.92–0.97)   | 0.0001   |
| Peripheral vascular disorders       | 1.04 (1.02–1.07)   | 0.0012   |
| Psychoses                           | 0.82 (0.79–0.85)   | < 0.0001 |
| Pulmonary circulation disorders     | 1.26 (1.23–1.30)   | < 0.0001 |
| Renal failure                       | 1.01 (0.99–1.04)   | 0.1780   |
| Solid tumor without metastasis      | 0.99 (0.95–1.04)   | 0.7647   |
| Peptic ulcer disease                | 0.97 (0.72–1.32)   | 0.8534   |
| Valvular disease                    | 1.61 (1.56–1.66)   | < 0.0001 |
| Weight loss                         | 0.97 (0.95–0.99)   | 0.0007   |
| Renal replacement therapy           | 1.16 (1.13–1.19)   | < 0.0001 |

Multivariate model: obtained from logistic regression model accounting for survey design and adjusting for year, age, race, insurance, sex, income, hospital region, hospital location/teaching status, hospital bed size, elective, Elixhauser comorbidity index, major operating room procedure, long-term anticoagulant, prior stroke, coronary artery disease, acquired immunodeficiency syndrome, alcohol abuse, deficiency anemias, rheumatoid arthritis, chronic blood loss anemia, congestive heart failure, chronic pulmonary disease, coagulopathy, depression, diabetes, uncomplicated, diabetes with chronic complications, drug abuse, hypertension, hypothyroidism, liver disease, lymphoma, fluid and electrolyte disorders, metastatic cancer, other neurological disorders, obesity, paralysis, peripheral vascular disorders, psychoses, pulmonary circulation disorders, renal failure, solid tumor without metastasis, peptic ulcer disease, valvular disease, weight loss, renal replacement therapy.

OR, odds ratio; CI, confidence interval.
